# Supplementary material
Source: Royal Society of Chemistry journal article supplement (doi:10.1039/d6cy00166a)
Supplement: d6cy00166a1.pdf [file d6cy00166a1.pdf]

## Supplementary Information

### Acid-induced morphological engineering of g-C<sub>3</sub>N<sub>4</sub> for enhanced piezocatalytic hydrogen peroxide synthesis

Menghan Lv<sup>a</sup>, Jieyu Chen<sup>a,\*</sup>, Xinlong Wu<sup>a</sup>, Han Chen<sup>a</sup>, Zhou Jun<sup>a,b</sup>, Zhu Shu<sup>a,b</sup>

<sup>a</sup> Engineering Research Center of Nano-Geomaterials of Ministry of Education, Faculty of Materials Science and Chemistry, China University of Geosciences, 388 Lumo Road, Wuhan 430074, China

<sup>b</sup> Hubei Three Gorges Laboratory, 1 Mazongling Road, Yichang 443007, China

\* Corresponding author at: Engineering Research Center of Nano-Geomaterials of Ministry of Education, Faculty of Materials Science and Chemistry, China University of Geosciences, 388 Lumo Road, Wuhan 430074, China. E-mail address: chenjieyu@cug.edu.cn

The apparent thickness and lateral size of CN and CN-60 were statistically measured from SEM images using ImageJ software after calibration based on the scale bar in each image. Multiple edge profiles or nanosheets were randomly selected for measurement. The statistical results are reported as mean  $\pm$  standard deviation for thickness and as range for lateral size.

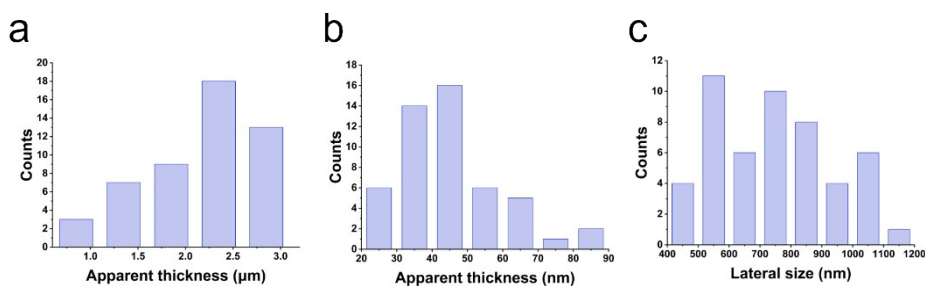

Fig. S1. Statistical analysis of the apparent thickness and lateral size of CN and CN-60 based on SEM images using ImageJ software: (a) apparent thickness distribution of CN, (b) apparent thickness distribution of CN-60, and (c) lateral size distribution of CN-60.

| Sample | Parameter               | Result      |
|--------|-------------------------|-------------|
| CN     | Apparent thickness (μm) | 2.13±0.61   |
| CN-60  | Apparent thickness (nm) | 45.46±14.49 |
| CN-60  | Lateral size (μm)       | 0.453-1.128 |

Table S1. Statistical summary of the apparent thickness and lateral size measured from SEM images using ImageJ software.
